P442

Strictureplasty for Crohn's disease of the small bowel in the biological era: long-term outcomes and risk factors for site specific recurrence

M. Rottoli, C. A. Manzo, M. Tanzanu, F. Rizzello, P. Gionchetti, G. Poggioli  
*Sant'Orsola Hospital, Alma Mater Studiorum University of Bologna, Department of Medical and Surgical Sciences, Bologna, Italy*

**Background:** Patients affected by Crohn's disease (CD) often require multiple surgeries and are at higher risk of short bowel syndrome. While bowel-sparing techniques should still have an indication in these patients, a considerable reduction of the use of strictureplasty has been observed, especially since the introduction of biological drugs.

**Methods:** Patients undergoing strictureplasty for small bowel CD from 2002 were included.

Risk factor for recurrence of CD were analysed through a multi-level logistic regression analysis, considering the hierarchical structure of the data. Level-2 variables were related to patient, level-1 to strictureplasty. A model without predictors was run to calculate the intraclass correlation coefficient to evaluate the degree of homogeneity of the outcome within patients; an intermediate model adding level-1 and level-2 variables and testing all intra-level interactions was subsequently performed. The estimated residual standard deviation and the estimated residual intraclass correlation of random-intercept logistic model were calculated. All *p* values refer to two-tailed tests of significance. A *p*-value of <0.05 was considered significant.

**Results:** A total of 266 patients were included in the study. Overall, 718 strictureplasties were performed. Median follow-up time was 96 months (6–209). Site specific recurrence rate was 1.6% at 2 years, 12.7% at 5 years, and 25.7% at 10 years.

|                                          | Number, mean or median | %, standard deviation or range |
|------------------------------------------|------------------------|--------------------------------|
| Total number of patients                 | 266                    |                                |
| Mean number of strictureplasties/patient | 1.95                   | ±2.85                          |
| Median age of patients (years)           | 39.5                   | 18–76                          |
| Median years of disease                  | 8.2                    | 0.1–37                         |
| Number of additional resections          | 196                    | 73.7%                          |
| Smoking after strictureplasty            | 68                     | 25.6%                          |
| Biologics after strictureplasty          | 79                     | 29.7%                          |
| Biologics before strictureplasty         | 72                     | 27.1%                          |
| Previous surgery for Crohn's disease     | 85                     | 32.0%                          |

Characteristics of patients undergoing strictureplasty for Crohn's disease

|                                 | N   | %    |
|---------------------------------|-----|------|
| Total number of strictureplasty | 718 |      |
| Ileum                           | 440 | 61.3 |
| Jejunum                         | 135 | 18.8 |
| Terminal ileum                  | 143 | 19.9 |
| Conventional strictureplasty    | 643 | 89.6 |
| Nonconventional strictureplasty | 75  | 10.4 |
| New stricture                   | 651 | 90.7 |
| Recurrence on strictureplasty   | 36  | 5    |
| Recurrence on anastomosis       | 31  | 4.3  |

Characteristics of the strictureplasties performed

| Variables                               | Odd ratio | Standard error | p-value |
|-----------------------------------------|-----------|----------------|---------|
| Ileum location                          | 1.49      | 0.35           | 0.091   |
| Nonconventional strictureplasty         | 3.57      | 1.72           | 0.008   |
| Strictureplasty on previous anastomosis | 13.59     | 11.18          | 0.002   |
| Age                                     | 0.98      | 0.01           | 0.246   |
| Total number of strictureplasties       | 1.13      | 0.08           | 0.088   |
| Use of biologics after strictureplasty  | 4.75      | 2.25           | 0.001   |
| Duration of disease                     | 1.26      | 1.04           | 0.776   |

Results of the multi-level regression logistic analysis of risk factors for site specific recurrence.

**Conclusions:** Strictureplasty is a safe procedure and is correlated with acceptable recurrence-free rates also after a very long follow-up time. Despite nonconventional strictureplasties are associated with a significantly higher risk of site specific relapse, whenever possible a bowel sparing technique should be performed, especially in the presence of long strictures. In case of a recurrence of a previous anastomosis, a resection should be preferred. The use of biologics after surgery identifies patients at higher risk of recurrence. The effect of biological drugs on long-term outcome after bowel sparing technique should be assessed in future prospective trials.

P443

Clinical features, therapeutic requirements, and evolution of patients with Crohn's disease and upper digestive tract involvement (CROHNEX study)

E. Sainz Arnau<sup>\*1</sup>, Y. Zabana<sup>2</sup>, I. Miguel<sup>3</sup>, A. Fernández Clotet<sup>4</sup>, M. J. Casanova<sup>5</sup>, M. D. Martín<sup>6</sup>, M. D. Picó<sup>7</sup>, E. Alfambra<sup>8</sup>, I. Rodríguez<sup>9</sup>, F. Muñoz<sup>10</sup>, M. Domínguez<sup>11</sup>, E. Iglesias<sup>12</sup>, D. Busquets<sup>13</sup>, A. Gutiérrez<sup>14</sup>, F. Cañete<sup>15</sup>, L. Nuñez<sup>16</sup>, C. Taxonera<sup>17</sup>, B. Beltrán<sup>18</sup>, B. Camps<sup>19</sup>, X. Calvet<sup>20</sup>, P. Navarro<sup>21</sup>, M. Calafat<sup>22</sup>, R. Ferreira-Iglesias<sup>23</sup>, C. González-Muñoz<sup>24</sup>, B. Sicilia<sup>25</sup>, C. Rodríguez<sup>26</sup>, A. Y. Carbajo<sup>27</sup>, M. van Domselaar<sup>28</sup>, R. Vicente<sup>29</sup>, M. Piqueras<sup>30</sup>, M. C. Muñoz<sup>31</sup>, À. Abad<sup>32</sup>, A. Algaba<sup>33</sup>, P. Martínez<sup>34</sup>, M. I. Vela<sup>35</sup>, B. Antolín<sup>36</sup>, J. M. Huguet<sup>37</sup>, L. Bujanda<sup>38</sup>, R. H. Lorente<sup>39</sup>, P. Almela<sup>40</sup>, M. J. García<sup>41</sup>, P. Ramírez de la Piscina<sup>42</sup>, R. Pajares<sup>43</sup>, I. Pérez-Martínez<sup>44</sup>, A. J. Lucendo<sup>45</sup>, O. Merino<sup>46</sup>, J. Legido<sup>47</sup>, I. Vera<sup>48</sup>, V. J. Morales<sup>49</sup>, M. Esteve<sup>2</sup>

<sup>1</sup>Hospital Sant Joan de Déu Althaia - Manresa, Gastroenterology, Manresa- Barcelona, Spain, <sup>2</sup>Hospital Mútua de Terrassa, Gastroenterology, Terrassa- Barcelona, Spain, <sup>3</sup>Hospital Arnau de Vilanova, Gastroenterology, Lleida, Spain, <sup>4</sup>Hospital Clínic de Barcelona, Gastroenterology, Barcelona, Spain, <sup>5</sup>Hospital Universitario de la Princesa, Gastroenterology, Madrid, Spain, <sup>6</sup>Hospital La Paz, Gastroenterology, Madrid, Spain, <sup>7</sup>HGU de Elche, Gastroenterology, Elche- Alicante, Spain, <sup>8</sup>Hospital Clínic Universitario Lozano Blesa, Gastroenterology, Zaragoza, Spain, <sup>9</sup>Hospital de Galdakao, Gastroenterology, Galdakao- Vizcaya, Spain, <sup>10</sup>HU Salamanca, Gastroenterology, Salamanca, Spain, <sup>11</sup>Hospital San Jorge, Gastroenterology, Huesca, Spain, <sup>12</sup>Hospital Reina Sofía, Gastroenterology, Córdoba, Spain, <sup>13</sup>Hospital dr. Josep Trueta, Gastroenterology, Girona, Spain, <sup>14</sup>HGU Alicante, Gastroenterology, Alicante, Spain, <sup>15</sup>Hospital Germans Trias i Pujol, Gastroenterology, Barcelona, Spain,

<sup>16</sup>Hospital Ramón y Cajal, Gastroenterology, Madrid, Spain, <sup>17</sup>Hospital Clínico San Carlos, Gastroenterology, Madrid, Spain, <sup>18</sup>Hospital La Fe, Gastroenterology, Valencia, Spain, <sup>19</sup>Hospital de Bellvitge, Gastroenterology, Barcelona, Spain, <sup>20</sup>Hospital Parc Taulí, Gastroenterology, Sabadell-Barcelona, Spain, <sup>21</sup>Hospital Clínico, Gastroenterology, Valencia, Spain, <sup>22</sup>Hospital Son Llàtzer, Gastroenterology, Mallorca, Spain, <sup>23</sup>Hospital de Santiago, Gastroenterology, Santiago de Compostela, Spain, <sup>24</sup>Hospital de la Santa Creu i Sant Pau, Gastroenterology, Barcelona, Spain, <sup>25</sup>Complejo Hospitalario de Burgos, Gastroenterology, Burgos, Spain, <sup>26</sup>Complejo Hospitalario de Navarra, Gastroenterology, Pamplona, Spain, <sup>27</sup>Hospital Río Hortega, Gastroenterology, Valladolid, Spain, <sup>28</sup>Hospital de Torrejón, Gastroenterology, Torrejón-Madrid, Spain, <sup>29</sup>HU Miguel Servet, Gastroenterology, Zaragoza, Spain, <sup>30</sup>Consorci Sanitari Mútua de Terrassa, Gastroenterology, Terrassa-Barcelona, Spain, <sup>31</sup>Hospital de Basurto, Gastroenterology, Basurto-Bilbao, Spain, <sup>32</sup>Hospital Viladecans, Gastroenterology, Viladecans-Barcelona, Spain, <sup>33</sup>HU de Fuenlabrada, Gastroenterology, Fuenlabrada-Madrid, Spain, <sup>34</sup>Hospital 12 de Octubre, Gastroenterology, Madrid, Spain, <sup>35</sup>Hospital Nuestra Señora de la Candelaria, Gastroenterology, Santa Cruz de Tenerife, Spain, <sup>36</sup>Hospital Clínico, Gastroenterology, Valladolid, Spain, <sup>37</sup>Hospital General Universitario, Gastroenterology, Valencia, Spain, <sup>38</sup>Hospital de Donostia, Gastroenterology, Donostia, Spain, <sup>39</sup>Hospital General, Gastroenterology, Ciudad Real, Spain, <sup>40</sup>Hospital General, Gastroenterology, Castelló, Spain, <sup>41</sup>Hospital Marqués de Valdecilla, Gastroenterology, Santander, Spain, <sup>42</sup>HU de Álava, Gastroenterology, Álava, Spain, <sup>43</sup>Hospital Infanta Sofía, Gastroenterology, Madrid, Spain, <sup>44</sup>HU Central de Asturias, Gastroenterology, Oviedo, Spain, <sup>45</sup>Hospital General de Tomelloso, Gastroenterology, Tomelloso-Ciudad Real, Spain, <sup>46</sup>Hospital de Cruces, Gastroenterology, Barakaldo-Bilbao, Spain, <sup>47</sup>Hospital de Segovia, Gastroenterology, Segovia, Spain, <sup>48</sup>HU Puerta de Hierro, Gastroenterology, Majadahonda-Madrid, Spain, <sup>49</sup>Hospital General de Granollers, Gastroenterology, Granollers-Barcelona, Spain

**Background:** Patients with upper (L4) and diffuse (L1 + L4) Crohn's disease (CD) may have a more aggressive and refractory disease course. However, evidence on this particular sub-type of patients is scarce. Clinical guidelines do not offer specific protocols on how to manage them.

**Methods:** To identify the clinical characteristics, therapeutic requirements and complications that are independently associated with an upper digestive tract CD involvement.

**METHODS:** Retrospective study of cases and controls matched (1: 2) by sex and age in patients with CD (L4 or L1 + L4: cases; L1 or L3: controls) of the ENEIDA database (49 hospitals). The small intestine was evaluated with radiologic and/or endoscopic examination, and complex perianal disease was excluded. Clinical variables: pattern, severity, anaemia; Complications: stenosis, fistula, abscess, perforation and digestive bleeding; Therapeutic requirements: use of 1 anti-TNF, more than 1 anti-TNF, anti-TNF intensification, second-line biologic drug, iv iron, blood transfusions, enteral nutrition, endoscopic/radiological treatments, surgeries and hospitalisations were investigated. A logistic regression analysis with those significant variables in univariate analysis (SPSS) was performed.

**Results:** In total, 919 cases and 1838 controls were identified. Multivariate analysis showed that cases were independently associated to stricturing pattern at diagnose (OR: 1.2, 95% CI: 1–1.5;  $p = 0.048$ ), iron deficient anaemia (OR: 2.3, 95% CI: 1.6–3.4;  $p < 0.0001$ ),

more extensive involvement ( $> 30$  cm) (OR: 2.7, 95% CI: 2.3–3.3;  $p < 0.0001$ ), and the use of second-line biologics during follow-up (OR 1.6, CI 95% 1–2.4;  $p = 0.04$ ). In contrast, they exhibit less abscesses (OR 0.6, 95% CI: 0.5–0.8;  $p = 0.001$ ) and have less familial history of inflammatory bowel disease (OR 0.7, 95% CI: 0.6–0.9;  $p = 0.008$ ).

**Conclusions:** In the most extensive series of upper digestive tract involvement in CD, it is shown that they present a more advanced disease at CD diagnosis, suggesting either a late diagnosis or different physiopathologic pathways for L4 involvement. Consequently, they are more refractory to treatments, requiring more frequently second-line biologics. A specific diagnostic and therapeutic strategy must be considered for these patients. This includes consider signs that allow a high rate of suspicion such as iron deficient anaemia in patients with normal upper and lower endoscopy.

## P444

### Post-induction Infliximab trough levels in severe and moderate paediatric ulcerative colitis: preliminary data of a retrospective, population cohort-based study

M. Martinelli<sup>1,2</sup>, H. Moore<sup>2</sup>, N. Devas<sup>2</sup>, A. Galgano<sup>2</sup>, R. N. Baldassano<sup>2</sup>

<sup>1</sup>University of Naples, Translational Medical Science, Section of Pediatrics, Naples, Italy, <sup>2</sup>Children Hospital of Philadelphia, Gastroenterology, Hepatology and Nutrition Division, Philadelphia, USA

**Background:** Recent adult evidences suggest that Infliximab (IFX) trough levels (TL) in acute severe colitis (ASC) patients may be decreased due to a higher faecal loss and severe tissue damage. The aims of this study were to evaluate post-induction trough levels (TL) in severe and moderate UC children and to compare disease outcomes.

**Methods:** This was a single-centre, retrospective study involving the IBD unit of the Children Hospital of Philadelphia. Children aged from 6 to 21 years with a confirmed diagnosis of UC, starting IFX with a PUCAI  $\geq 35$  and with available post-induction TL between July 2012 and July 2018 were recruited. The following information were recorded: age at diagnosis; disease extent, and clinical activity index based on PUCAI before IFX starting; therapeutic history, IFX dosage, timing between infusions, primary non-response (PNR), loss of response (LOR), and surgery after IFX starting. Post induction TL and laboratory evaluations including complete blood count, C-reactive protein (CRP), erythrocyte sedimentation rate (ESR), and albumin at the moment of IFX starting were also collected.

**Results:** Fifty-two UC children were included in this preliminary analysis. Of these, twenty-one (38.5%) had a PUCAI  $\geq 65$ , while 31 (61.5%) showed PUCAI values  $\geq 35 < 65$ . When compared with moderate UC children, patients affected by ASC presented significant lower median values of haemoglobin ( $p = 0.05$ ), while showing significant higher values of ESR ( $p = 0.04$ ). The median IFX dosage at the induction was significantly higher in the ASC group when compared with the moderate UC (10 vs. 5 mg/kg;  $p = 0.03$ ). Median post-induction TL were lower in patients with ASC when compared with moderately severe UC with a trend towards statistical significance [4.35 (0–40) vs. 11.5 (0–40);  $p = 0.07$ ] (Figure 1).
